# Supplementary material for: Influence of Amphibian Antimicrobial Peptides and Short Lipopeptides on Bacterial Biofilms Formed on Contact Lenses
Source: PubMed Central journal article supplement (PMC5457276; doi:10.3390/ma9110873), 2016-10-26

## MS and HPLC analysis

### Peptides:

- 1) Citropin 1.1
- 2) Pal-KK-NH<sub>2</sub>
- 3) Pal-RR-NH<sub>2</sub>
- 4) Pexiganan
- 5) Temporin A

### Mass spectrometry

Equipment: Waters, ACQUITY QDa mass detector.

Range: 50-1250 m/z.

Positive scan, Cone voltage 15V, Sampling rate - 2 points/sec, capillary voltage 1.0 kV.

### HPLC analysis

Equipment: Varian ProStar HPLC system,

Phenomenex, Luna<sup>®</sup> C18(2) column (100x3 mm, 5 μm, 100Å).

Mobile phase: Acetonitrile and water both containing 0.1 % of TFA (v/v).

Method: gradient of acetonitrile – 10-100% in 15 minutes. The data were collected for 16 min.

Detection: UV-Vis detector; absorbance at 214 nm.

## Results

### A\ MS analysis

#### A1: Citropin 1.1

Monoisotopic mass of the Citropin 1.1 is 1613.987 Da.

Table 1. Citropin 1.1.

| z | Calculated m/z | Measured m/z |
|---|----------------|--------------|
| 1 | 1614.99        | -            |
| 2 | 808.00         | 808.72       |
| 3 | 539.00         | 539.60       |

#### A2: Pal-KK-NH<sub>2</sub>

Monoisotopic mass of the Pal-KK-NH<sub>2</sub> is 511.44614 Da.

Table 2. Pal-KK-NH<sub>2</sub>.

| z | Calculated m/z | Measured m/z |
|---|----------------|--------------|
| 1 | 512.45         | 512.63       |
| 2 | 256.73         | -            |

Measured value of 1025.01 m/z refers to dimer – [2M+2H]<sup>2+</sup> (calculated value is 1024.91).

### A3: Pal-RR-NH<sub>2</sub>

Monoisotopic mass of the Pal-RR-NH<sub>2</sub> is 567.458 Da.

Table 3. Pal-RR-NH<sub>2</sub>.

| z | Calculated m/z | Measured m/z |
|---|----------------|--------------|
| 1 | 568.47         | 568.63       |
| 2 | 284.74         | 285.02       |

### A4: Pexiganan

Monoisotopic mass of the Pexiganan is 2475.630 Da.

Table 4. Pexiganan.

| z  | Calculated m/z | Measured m/z |
|----|----------------|--------------|
| 1  | 2476,64        | -            |
| 2  | 1238,82        | 1239.48      |
| 3  | 826,22         | 826.85       |
| 4  | 619,92         | 620.70       |
| 5  | 496,13         | 496.70       |
| 6  | 413,61         | 414.23       |
| 7  | 354,67         | -            |
| 8  | 310,46         | -            |
| 9  | 276,08         | -            |
| 10 | 248,57         | -            |

### A5: Temporin A

Monoisotopic mass of the Temporin A is 1395.900 Da.

Table 5. Temporin A.

| z | Calculated m/z | Measured m/z |
|---|----------------|--------------|
| 1 | 1396,90        | -            |
| 2 | 698,96         | 699.51       |

## B\ HPLC analysis

### B1: Citropin 1.1

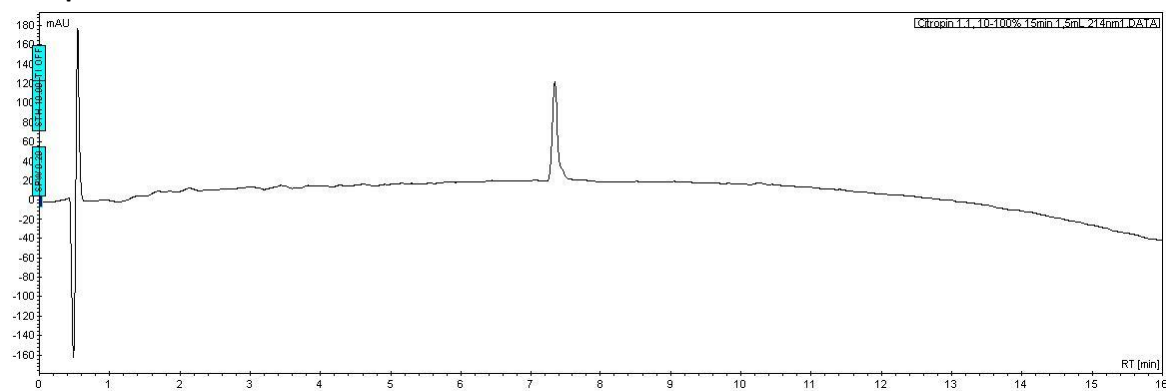

### B2: Pal-KK-NH2

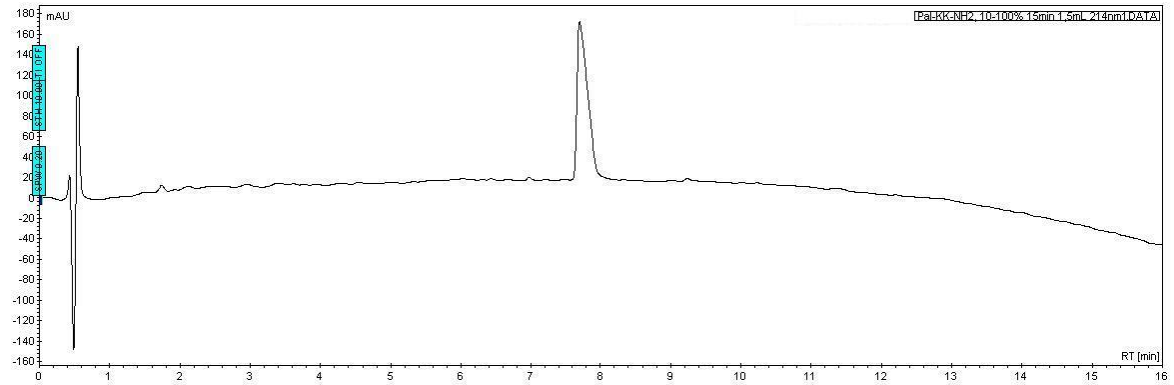

### B3: Pal-RR-NH2

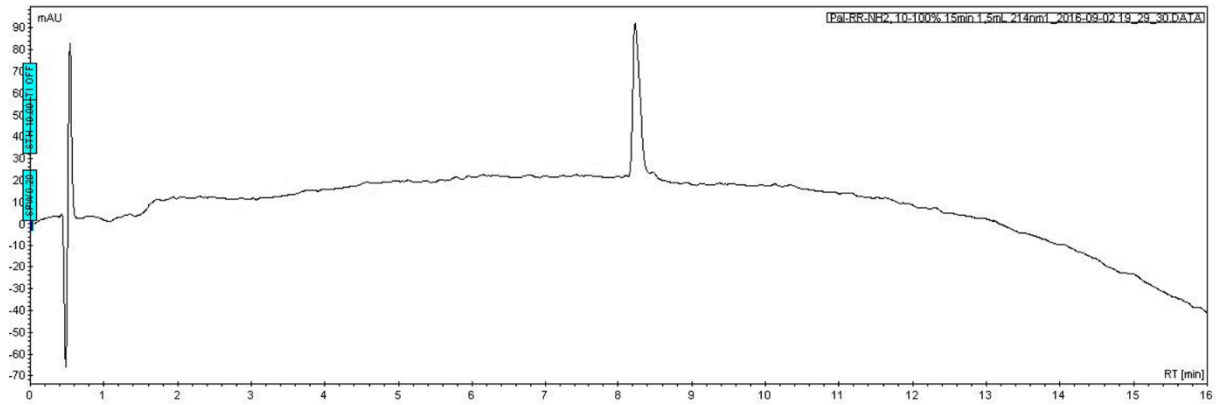

### B4: Pexiganan

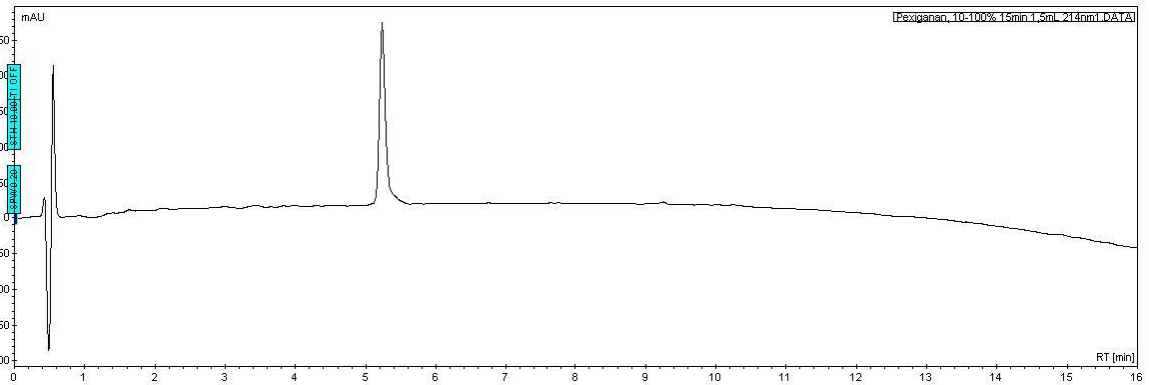

### B5: Temporin A

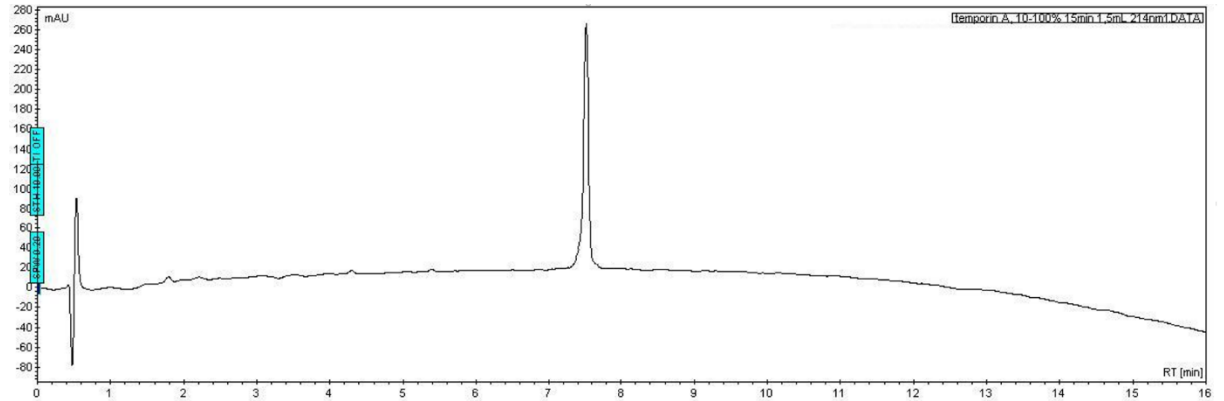

Supplement: materials-09-00873-s001.pdf [file materials-09-00873-s001.pdf]
